# Supplementary material
Source: PubMed Central journal article supplement (PMC2920742)

Biophysical Journal, Volume 99

Supporting Material

Actin filament length tunes elasticity of flexibly cross-linked actin networks

Karen E Kasza, Chase P Broedersz, Gijsje H Koenderink, Yi-Chia Lin, William Messner, Eleanor A Millman, Fumihiko Nakamura, Thomas P Stossel, Frederick C MacKintosh, and David A Weitz

### S1. Actin filament length distribution:

[gelsolin]:[actin] =  $R_G = 0$  (A), 1:3700 (B), 1:1850 (C), 1:740 (D), and 1:370 (E).

Image size is 82  $\mu\text{m}$ .

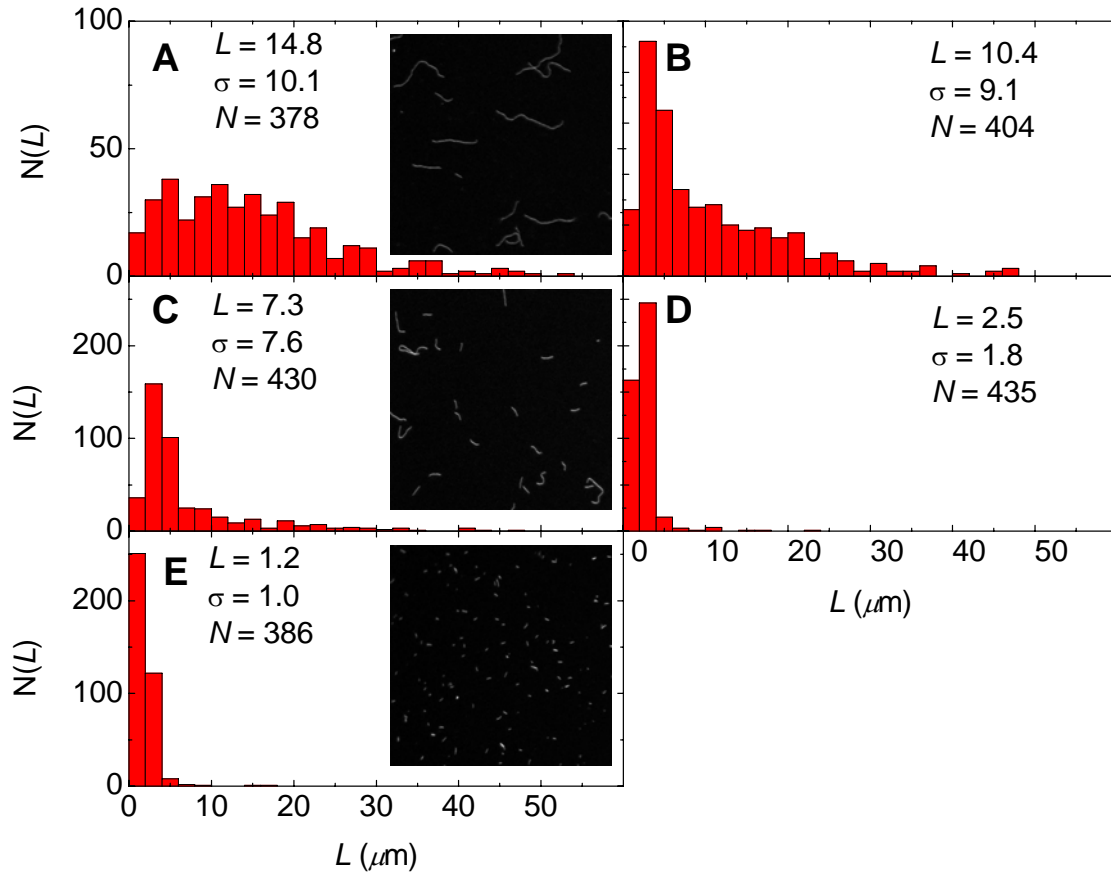

**S2. Transmission electron micrograph of F-actin:**

[gelsolin]:[actin] =  $R_G = 0$  ( $L = 15 \mu\text{m}$ ). Without filamin or biotin-NeutrAvidin crosslinks. Scale bar is 300 nm.

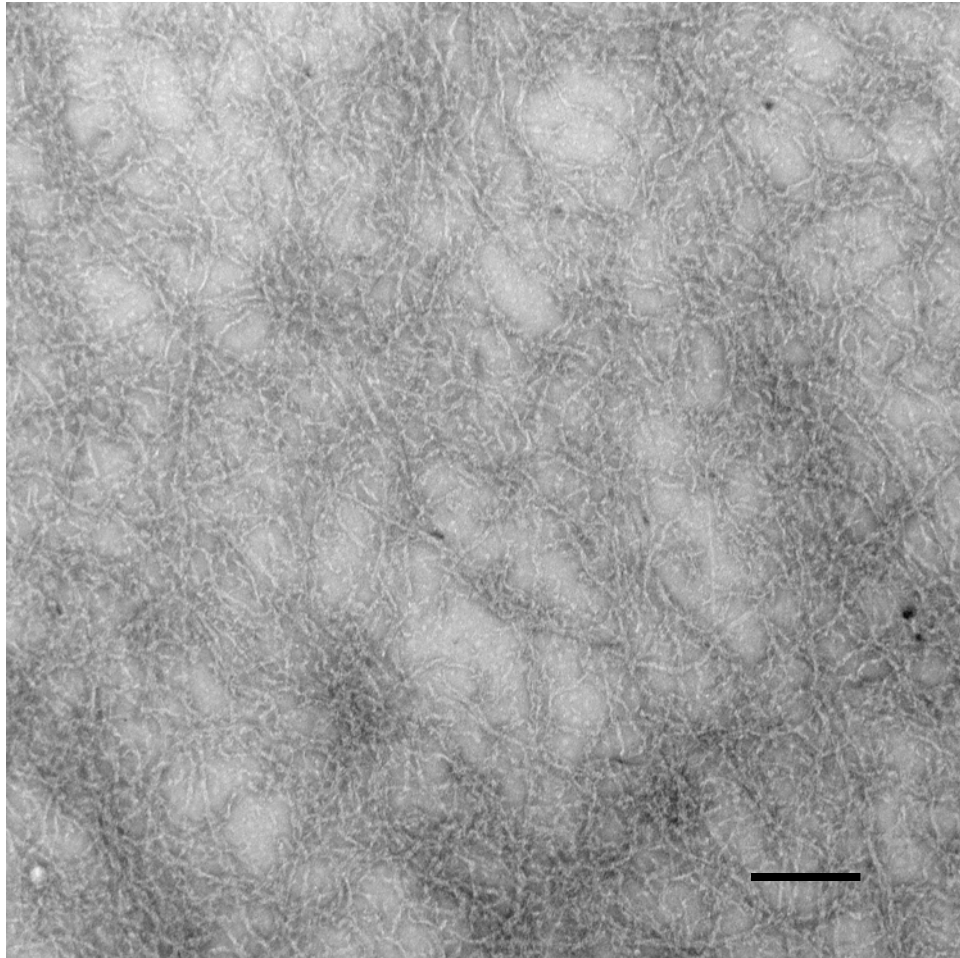

**S3. We confirm the bundling transition by tracking the thermal motion of 1 micron PEG-coated particles** within the networks. For 0.5 mg/ml actin and  $R_F = 0$ , where the mesh size is expected to be approximately 400 nm, the particles' ensemble mean-squared-displacement (MSD) reaches a plateau consistent with particles trapped inside an elastic medium with pore size smaller than the particle diameters. For  $R_F = 0.005$ , the MSD still reaches a plateau, but the plateau value is decreased compared to  $R_F = 0$ , indicating that the mesh size remains smaller than the particle diameter, but now the stiffness of the elastic medium has increased due to crosslinking. In contrast, when we further increase  $R_F$  to 0.01, the value of the MSD plateau now increases, suggesting there is an increase in the mesh size. Increasing  $R_F$  even further to 0.02, the slope of the MSD increases and never reaches a plateau. At this point, enough actin has partitioned into bundles that the typical mesh size has become larger than the particle diameter.

(A-C) Confocal microscopy of actin-filamin networks.

0.5 mg/ml actin, no gelsolin, various  $R_F$ : A)  $R_F = 0.002$ , B)  $R_F = 0.005$ , C)  $R_F = 0.01$ .

D) Multi-particle tracking shows effect of bundling. 0.5 mg/ml actin, no gelsolin, 1 micron PLL-PEG particles; 1-point, 1D MSD,  $R_F = 0$  (line), 0.005 (squares), 0.01 (triangles), 0.02 (crosses).

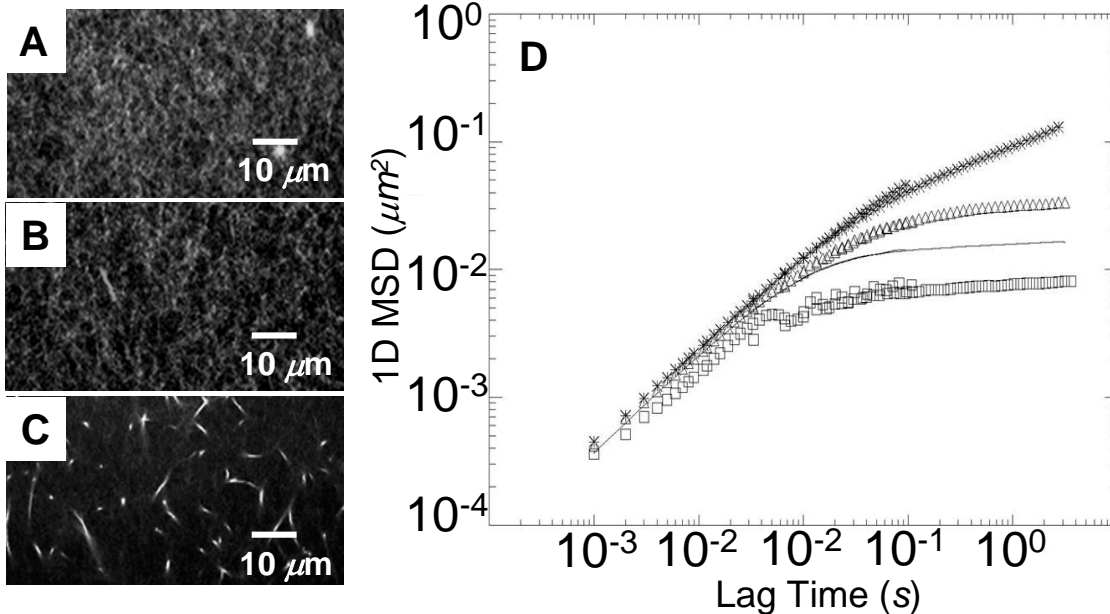

**S4. Power-law slope of  $G'(\omega)$  :**

0.5 mg/ml actin,  $L = 15$  microns.

Filamin vs.  $R_F$  (black circles). Biotin-NeutrAvidin vs.  $R_B$  (gray squares).

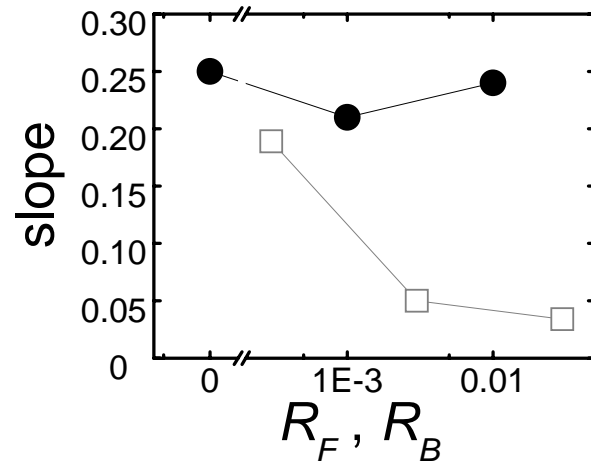

### S5. Nonlinear rheology:

Prestress measurements on networks with 1.0 mg/ml actin and  $R_F = 0.005$  filamin.

A) Small oscillatory stress superposed on a steady prestress. Measure oscillatory strain response to determine differential elastic and viscous moduli,  $K'$  and  $K''$ .

B) No time dependence in  $K'$  at various levels of prestress.

C) Minimal hysteresis in  $K'$  as prestress is ramped up to just below breakage stress and back down.

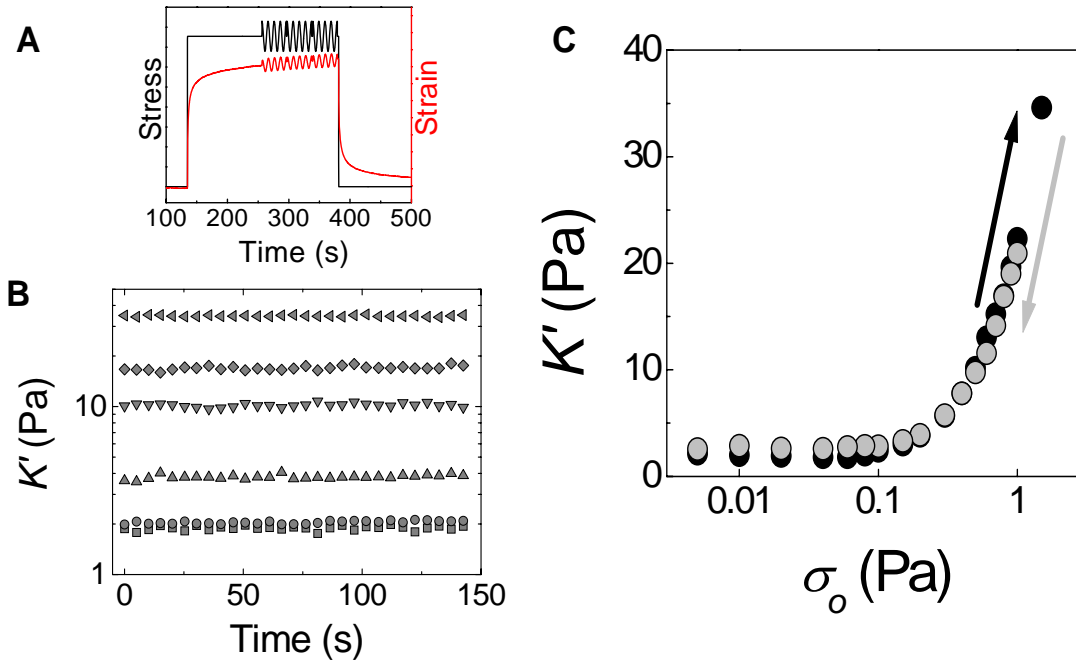

### S6. Maximum stress and stiffening for crosslinked networks:

A) Maximum stress as a function of  $R_F$  for filamin crosslinked networks with  $L = 15 \mu\text{m}$  (black circles) or  $L = 5 \mu\text{m}$  (black triangles) and as a function of  $R_B$  for rigidly crosslinked networks with  $L = 15 \mu\text{m}$  (gray circles). Gray line denotes mean maximum stress for rigidly crosslinked networks having  $R_B > 0.001$ .

B) Magnitude of stiffening as a function of crosslinking ratios for networks with  $L = 15 \mu\text{m}$ . Filamin vs.  $R_F$  (black circles), rigid crosslinks vs.  $R_B$  (gray circles).

(A-B) Non-bundled networks (solid symbols) and bundled networks (open symbols).

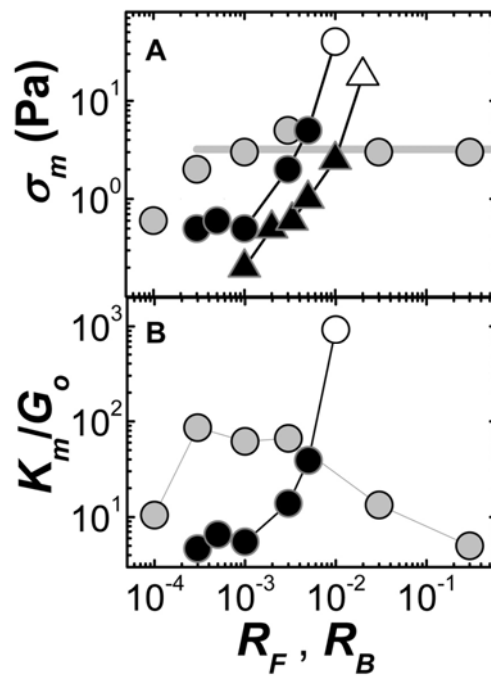

Supplement: mmc1.pdf [file mmc1.pdf]
